# Supplementary material
Source: publisher figshare collection journal article supplement (https://gsajournals.figshare.com/ndownloader/files/21743646)
Supplement: Supplementary file 1 [file 21743646]

# Supplementary Tables

**Table S1. Heritability for each trait in the two progeny populations.**

Dpi = Days post inoculation, SE = standard error.

**Table S2. Significant QTLs identified in mapping populations for growth-related traits under oxidative stress.**

Dpi = Days post inoculation, Chr = Chromosome, Var. = Variation explained.

**Table S3. Significant QTLs identified in mapping populations for melanization-related traits under oxidative stress.**

Dpi = Days post inoculation, Chr = Chromosome, Var. = Variation explained.
